# Supplementary material
Source: PubMed Central journal article supplement (PMC6777959)

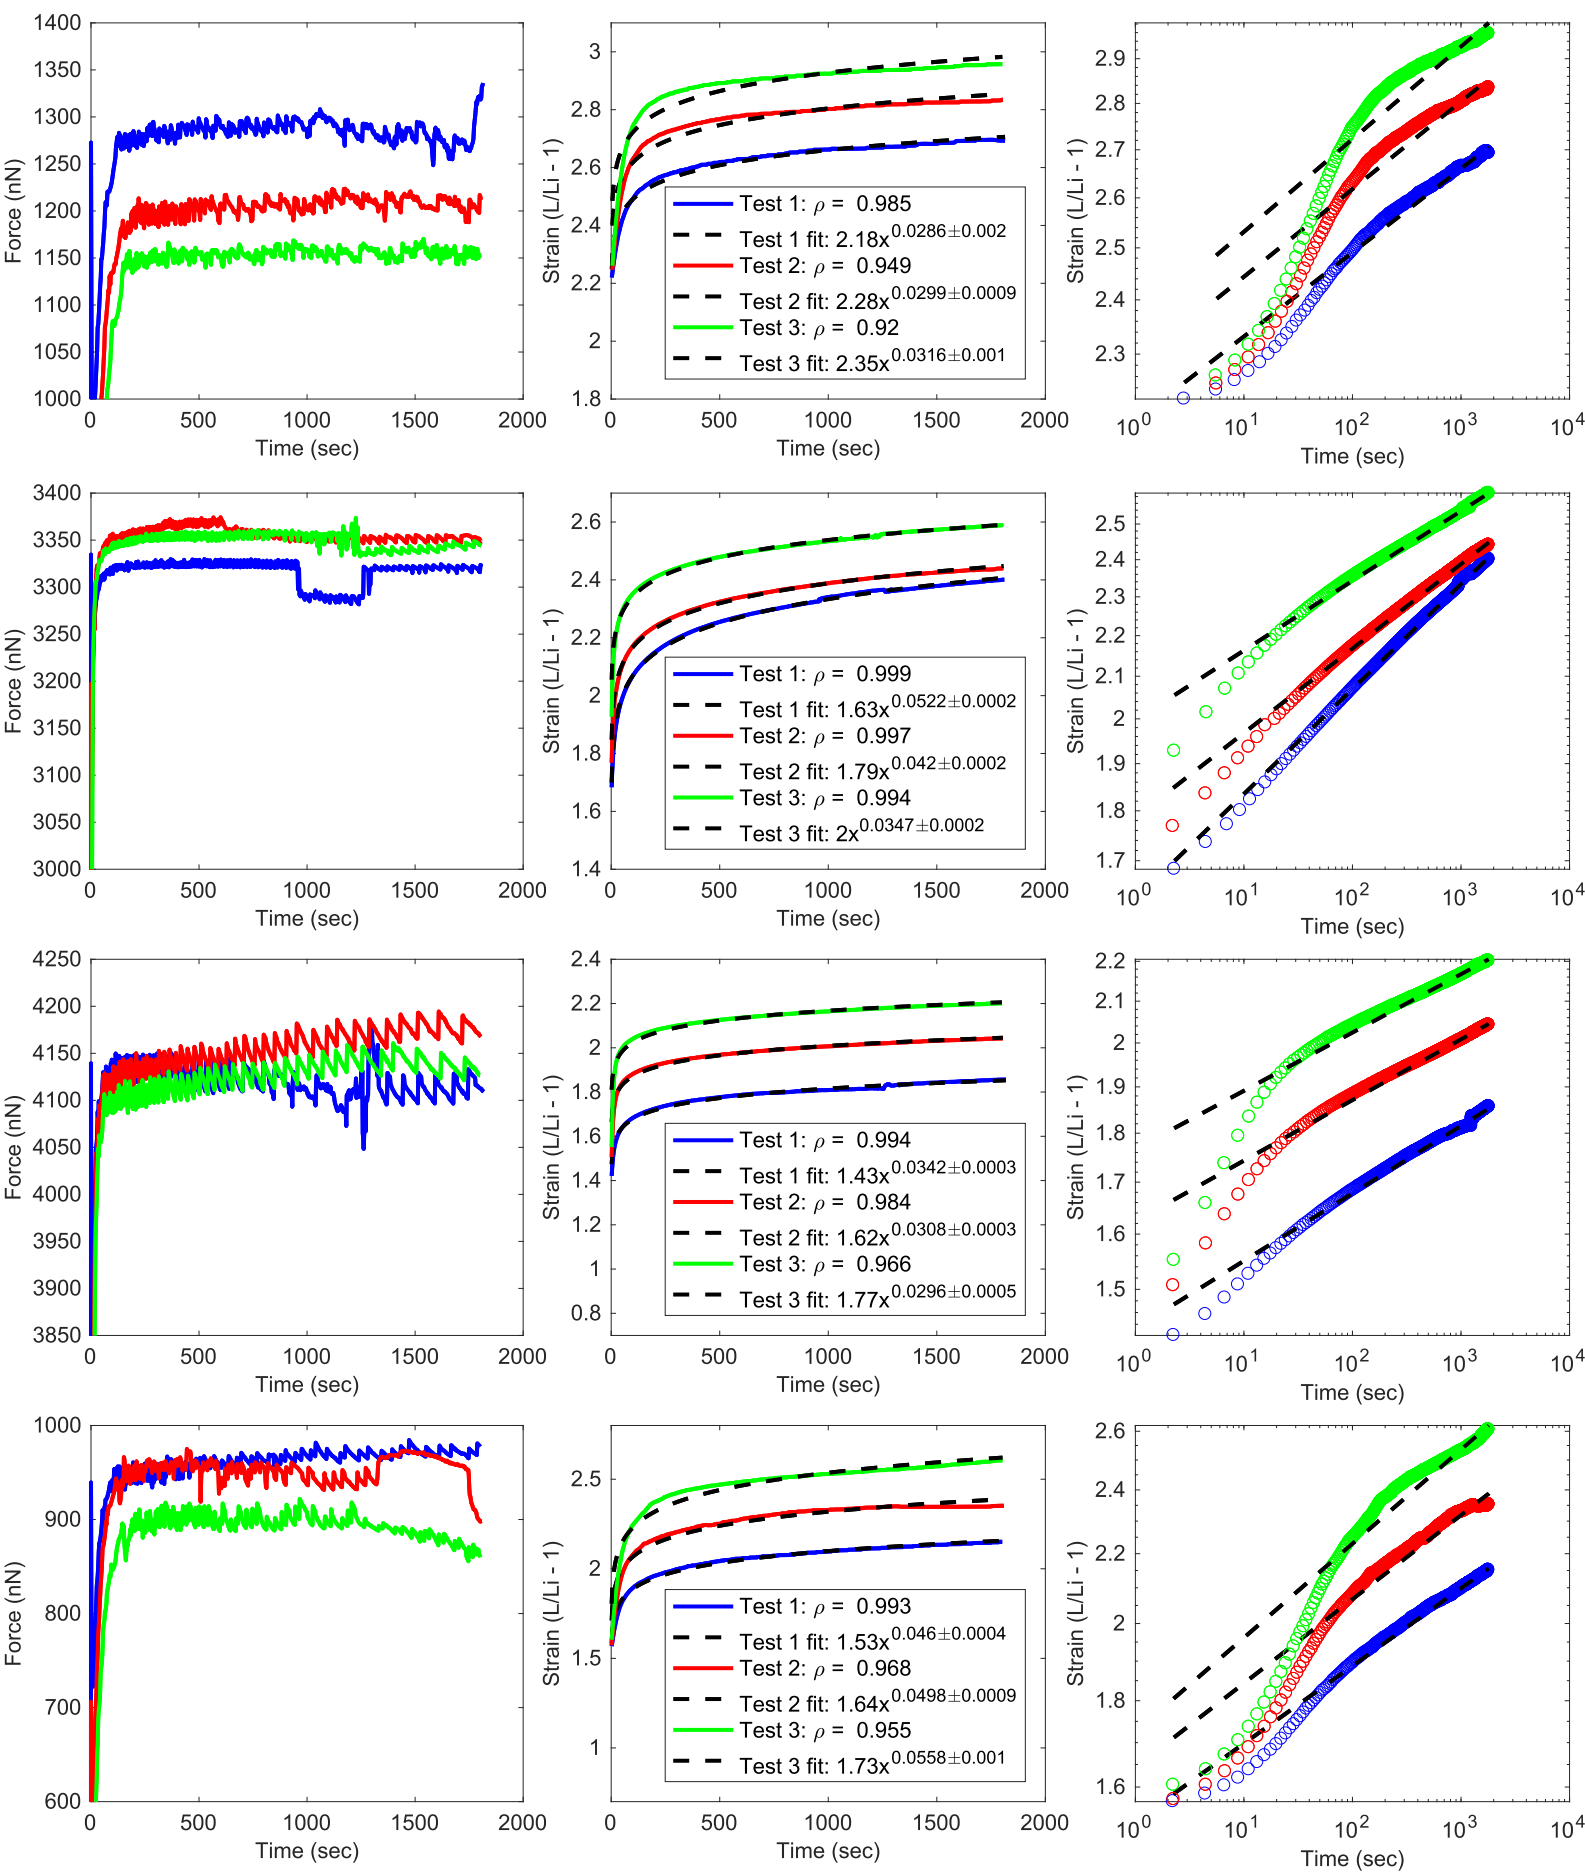

Supplement: NIHMS1522380-supplement-1.pdf [file NIHMS1522380-supplement-1.pdf]
